# Supplementary material for: Crack patterns of drying dense bacterial suspensions
Source: Royal Society of Chemistry journal article supplement (doi:10.1039/d2sm00012a), 2022-01-01
Supplement: d2sm00012a1.pdf [file d2sm00012a1.pdf]

## Supplementary Videos: “Crack patterns of drying dense bacterial suspensions”

Xiaolei Ma,<sup>1,\*</sup> Zhengyang Liu,<sup>1</sup> Wei Zeng,<sup>1,2</sup> Tianyi Lin,<sup>1</sup> Xin Tian,<sup>3</sup> and Xiang Cheng<sup>1,†</sup>

<sup>1</sup>*Department of Chemical Engineering and Materials Science,  
University of Minnesota, Minneapolis, MN 55455, USA*

<sup>2</sup>*College of Life Science and Technology, Guangxi University, Nanning 530004, Guangxi, China*

<sup>3</sup>*Department of Physics & Astronomy, University of Wyoming, Laramie, WY 82071, USA*

Video S1. The formation of circular cracks by drying a swimmer drop of initial volume  $V_i = 2.5 \mu\text{L}$  and initial bacterial volume fraction  $\phi_i = 14\%$ . The field of view of the video is  $3.3 \text{ mm} \times 3.2 \text{ mm}$ . The duration of the video is 700 s.

Video S2. Two-dimensional flow field at the edge of a drying swimmer drop of initial volume  $V_i = 2.5 \mu\text{L}$  and initial bacterial volume fraction  $\phi_i = 18\%$ . The field of view of the video is  $360 \mu\text{m} \times 360 \mu\text{m}$ . The duration of the video is 25 s.

Video S3. The formation of spiral-like cracks by drying a tumbler drop of initial volume  $V_i = 2.5 \mu\text{L}$  and initial bacterial volume fraction  $\phi_i = 14\%$ . The field of view of the video is  $3.3 \text{ mm} \times 3.2 \text{ mm}$ . The duration of the video is 564 s.

---

\* [iamxlma@gmail.com](mailto:iamxlma@gmail.com)

† [xcheng@umn.edu](mailto:xcheng@umn.edu)
